# Supplementary material
Source: PubMed Central journal article supplement (PMC8440412)
Supplement: NIHMS1720033-supplement-Supplementary_material.pdf [file NIHMS1720033-supplement-Supplementary_material.pdf]

8 In particular, we assume that the definition of  $\mathbf{q} = (q_1, \dots, q_S)$  becomes

$$q_k = \sum_{c=1}^2 \pi_c p_{ck}^*, \quad k = 1, \dots, S.$$

9 The term  $p_{ck}^*$  is defined by a multinomial logit model, where we treat the  $S$ th combination  
 10 of test results  $(0 \dots 0)$  as the reference,

$$\log \left( \frac{p_{ck}^*}{p_{cS}^*} \right) = \sum_{j=1}^T \alpha_{cj} x_{kj} + \gamma_c x_{k3} x_{k4}, \quad c = 1, 2, \quad k = 1, \dots, S - 1.$$

11 The terms  $\gamma_1$  and  $\gamma_2$  describe the dependence between tests 3 and 4 (Test-It *Leptospira* and  
 12 Leptocheck WB). The sensitivities and specificities are shown in Figure 1. The posterior  
 13 median for  $\pi_1$ , the prevalence of disease, was 0.11.

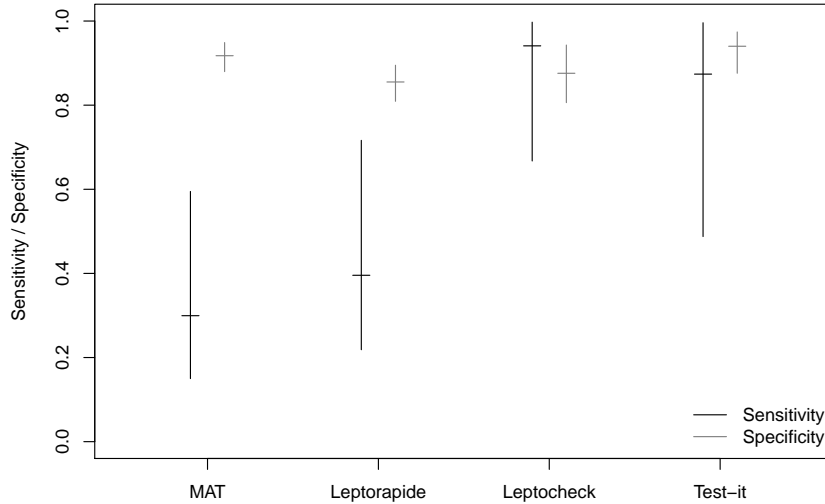

Figure 1: The vertical lines represent the central 90% credible intervals for sensitivity (black) and specificity (grey) for each of the four tests for the Tanzania data using the latent class model, allowing for dependence between Test-It *Leptospira* and Leptocheck WB. The horizontal line represents the median of the posterior distribution.

## 14 2 Pairwise posterior predictive checks

15 To assess lack-of-fit with respect to undiagnosed dependence we compare the observed pair-  
16 wise counts to their posterior predictive distribution. Pairwise counts are defined as the  
17 number of patients that tested positive any given pair of tests. This approach is in the  
18 spirit of Qu et al. (1996) who define a correlation residual between any given pair of tests.  
19 The observed pairwise counts appear to be consistent to their respective posterior predictive  
20 distributions (Figure 2).

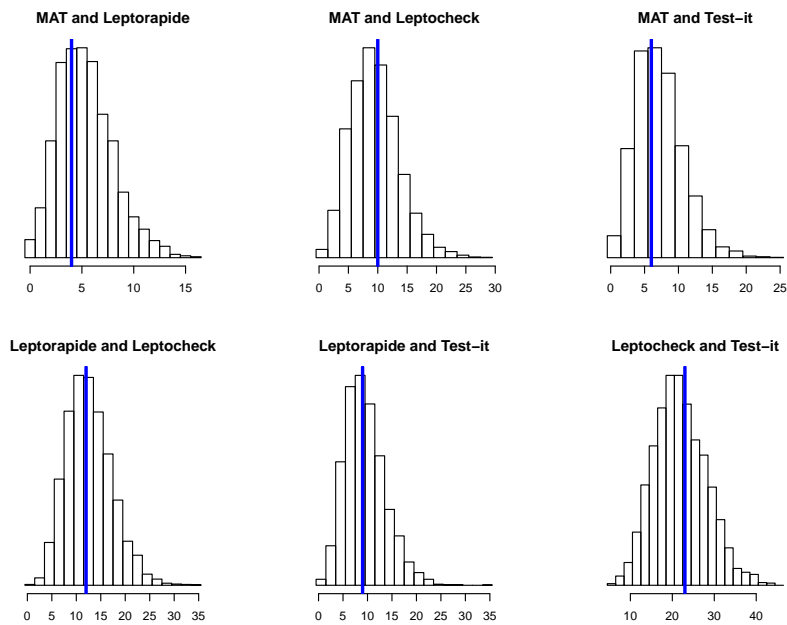

Figure 2: Posterior predictive distributions for the pairwise counts. Pairwise counts are defined as the number of patients that tested positive for both tests specified in the title of the plot. The vertical blue line gives the observed pairwise counts.

## 21 3 Label switching

22 To account for label switching, we use the algorithm of Stephens (2000) as implemented  
23 in the R package `label.switching` (Papastamoulis 2016). This algorithm is run after the

24 MCMC sampling is complete and assigns labels in order to minimize KL-divergence.

25 For the motivating data, we implement the algorithm on the full 30 000 draw from the  
26 posterior (three chains of 10 000 draws).

27 For the simulations, we thin the posterior samples. This increases the speed of the label  
28 switching algorithm and allows the simulation to be run in a reasonable time.

## 29 **4 Additional simulation**

30 A further simulation was performed at different parameter values (Table 1). They reflect  
31 a situation where all four tests have sensitivities ranging 0.50 to 0.90 for state 1. The  
32 sensitivities (state 2) range from 0.88 to 0.99. If an individual is in state 3, the probability of  
33 a positive test ranges from 0.20 to 0.6. The parameters used for the two-state and three-state  
34 model lead to similar expected counts (Table 2).

35 As with the simulation in the manuscript, we generate 1000 data sets under each the  
36 following four scenarios:

- 37 1. True model has two-states; sample size is  $N = 225$ .
- 38 2. True model has two-states; sample size is  $N = 1000$ .
- 39 3. True model has three-states; sample size is  $N = 225$ .
- 40 4. True model has three-states; sample size is  $N = 1000$ .

41 We follow the same process for fitting and summarizing the simulation results as in the  
42 manuscript. In particular, we find (i) the bias of the point estimates (Figure 3 and Table 3);  
43 (ii) the coverage of the interval estimates (Table 3); and (iii) the proportion of models that  
44 were assessed as ill-fitting (Table 4).

| <b>Parameter</b> | <b><math>M = 2</math></b> | <b><math>M = 3</math></b> |
|------------------|---------------------------|---------------------------|
| $p_{11}$         | 0.63                      | 0.80                      |
| $p_{21}$         | 0.57                      | 0.56                      |
| $p_{31}$         | 0.40                      | 0.50                      |
| $p_{41}$         | 0.72                      | 0.90                      |
| $p_{12}$         | 0.01                      | 0.01                      |
| $p_{22}$         | 0.06                      | 0.02                      |
| $p_{32}$         | 0.05                      | 0.05                      |
| $p_{42}$         | 0.12                      | 0.12                      |
| $p_{13}$         | –                         | 0.23                      |
| $p_{23}$         | –                         | 0.60                      |
| $p_{33}$         | –                         | 0.20                      |
| $p_{43}$         | –                         | 0.30                      |
| $\pi_1$          | 0.14                      | 0.08                      |
| $\pi_2$          | 0.86                      | 0.80                      |
| $\pi_3$          | –                         | 0.12                      |

Table 1: True parameter values for two-state ( $M = 2$ ) simulation and the three-state ( $M = 3$ ) simulation. The first two classes represent the disease of interest and no disease, respectively. The third class represents individuals with an alternate disease that triggers a response at a rate higher than the ‘no disease’ state. The value  $p_{jc}$  represents the probability of testing positive for test  $j$  when in class  $c$  and  $\pi_c$  is the probability of being in class  $c$ .

| Test 1 | Test 2 | Test 3 | Test 4 | Expected count |         |
|--------|--------|--------|--------|----------------|---------|
|        |        |        |        | $M = 2$        | $M = 3$ |
| 1      | 1      | 1      | 1      | 3.3            | 3.9     |
| 1      | 1      | 1      | 0      | 1.3            | 0.9     |
| 1      | 1      | 0      | 1      | 4.9            | 4.5     |
| 1      | 1      | 0      | 0      | 2.0            | 2.5     |
| 1      | 0      | 1      | 1      | 2.5            | 3.0     |
| 1      | 0      | 1      | 0      | 1.0            | 0.7     |
| 1      | 0      | 0      | 1      | 3.9            | 3.6     |
| 1      | 0      | 0      | 0      | 3.0            | 3.2     |
| 0      | 1      | 1      | 1      | 2.0            | 1.7     |
| 0      | 1      | 1      | 0      | 1.2            | 2.0     |
| 0      | 1      | 0      | 1      | 4.2            | 4.3     |
| 0      | 1      | 0      | 0      | 10.7           | 10.1    |
| 0      | 0      | 1      | 1      | 2.5            | 2.3     |
| 0      | 0      | 1      | 0      | 8.5            | 8.9     |
| 0      | 0      | 0      | 1      | 22.7           | 22.6    |
| 0      | 0      | 0      | 0      | 151.4          | 150.7   |

Table 2: The expected counts for the two true simulation models when  $N = 225$ . The expected counts are similar between the two-state ( $M = 2$ ) and three-state ( $M = 3$ ) models.

45 The broad conclusions are the same as with the simulation in the manuscript. The  
46 estimates are close to unbiased and coverage near nominal when data are simulated and  
47 fitted under a two-state latent class model (Figure 3 and Table 3). In contrast, many of  
48 the parameters, including sensitivities, specificities and prevalence are biased with very low  
49 coverage when data are simulated under the three-state model where we assume disease  
50 corresponds to state 1 (Figure 3 and Table 3).

51 We are unable to routinely identify the model misspecification with standard goodness-  
52 of-assessment approaches (Table 4), with nearly 90% of simulations showing no evidence of  
53 lack of fit when  $N = 225$ . That number is more than 70% when  $N = 1000$ .

54 As in the manuscript, we again consider the alternative definition that disease is a com-  
55 bination of state 1 and state 3. The bias is non-negligible and the coverage rates are poor,  
56 particularly when  $N = 1000$  (Figure 4 and Table 5).

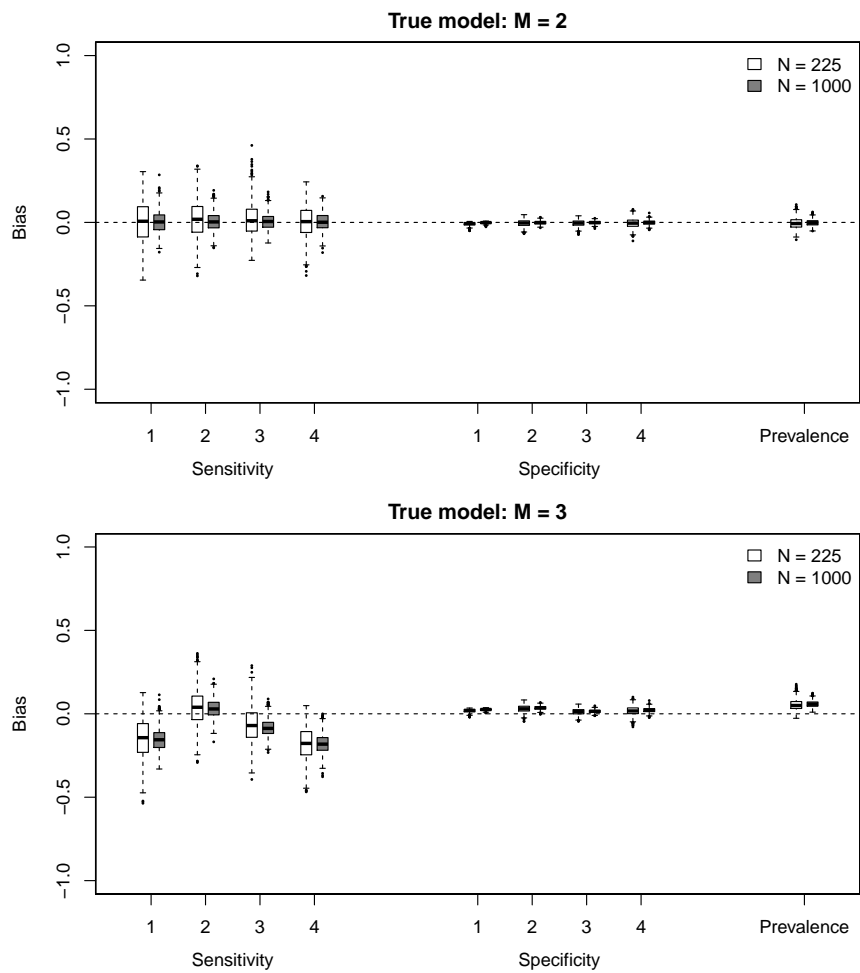

Figure 3: The difference between the true sensitivity/specificity and estimated sensitivity/specificity in each of the 1000 simulations when the true model had two-states ( $M = 2$ ) and three-states ( $M = 3$ ).

|                   | $M = 2$   |            |           |            | $M = 3$   |            |           |            |
|-------------------|-----------|------------|-----------|------------|-----------|------------|-----------|------------|
|                   | Bias      |            | Coverage  |            | Bias      |            | Coverage  |            |
|                   | $N = 225$ | $N = 1000$ |
| sens <sub>1</sub> | 0.003     | 0.004      | 0.91      | 0.91       | -0.147    | -0.155     | 0.73      | 0.25       |
| sens <sub>2</sub> | 0.017     | 0.005      | 0.92      | 0.91       | 0.038     | 0.031      | 0.90      | 0.86       |
| sens <sub>3</sub> | 0.018     | 0.004      | 0.90      | 0.90       | -0.066    | -0.084     | 0.85      | 0.49       |
| sens <sub>4</sub> | 0.003     | 0.003      | 0.93      | 0.91       | -0.177    | -0.182     | 0.46      | 0.03       |
| spec <sub>1</sub> | -0.009    | -0.002     | 0.93      | 0.92       | 0.018     | 0.025      | 0.72      | 0.04       |
| spec <sub>2</sub> | -0.005    | -0.001     | 0.90      | 0.90       | 0.030     | 0.036      | 0.63      | 0.07       |
| spec <sub>3</sub> | -0.005    | -0.001     | 0.90      | 0.90       | 0.012     | 0.014      | 0.85      | 0.53       |
| spec <sub>4</sub> | -0.005    | -0.001     | 0.89      | 0.89       | 0.017     | 0.022      | 0.85      | 0.50       |
| $\pi_1$           | -0.005    | -0.002     | 0.92      | 0.90       | 0.054     | 0.059      | 0.49      | 0.02       |

Table 3: The bias and coverage of sensitivity and specificity for each of the four tests across the various simulation strategies. The value of  $M$  denotes the number of states in the true model. The labels sens <sub>$i$</sub>  and spec <sub>$i$</sub>  represent the sensitivity and specificity of test  $i$ , respectively. The posterior median was used for estimation and the coverage is based off a 90% central credible interval.

| $M$ | $N$  | $\Pr(P_B < 0.05)$ | $\Pr(P_B^* < 0.05)$ |
|-----|------|-------------------|---------------------|
| 2   | 225  | 0.01              | 0.05                |
| 2   | 1000 | 0.00              | 0.05                |
| 3   | 225  | 0.01              | 0.06                |
| 3   | 1000 | 0.08              | 0.28                |

Table 4: The probability of rejecting the Bayesian  $p$ -value ( $P_B$ ) as well as the calibrated Bayesian  $p$ -value ( $P_B^*$ ) in the simulation. The true model is indexed based on the number of latent states ( $M$ ) and the sample size is given by  $N$ .

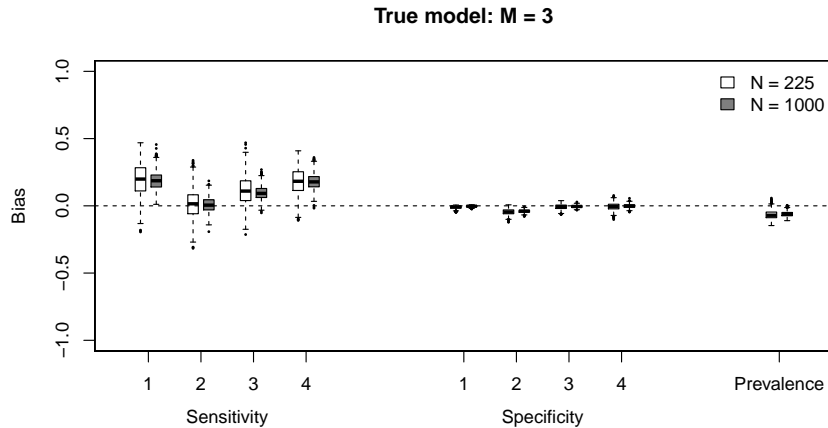

Figure 4: The difference between the true sensitivity/specificity and estimated sensitivity/specificity of the 1000 simulations when the true model has three-states ( $M = 3$ ). We assess the sensitivity of the test to diagnose any disease (either state 1 or state 3).



|                   | <b>Bias</b> |            | <b>Coverage</b> |            |
|-------------------|-------------|------------|-----------------|------------|
|                   | $N = 225$   | $N = 1000$ | $N = 225$       | $N = 1000$ |
| sens <sub>1</sub> | 0.195       | 0.187      | 0.58            | 0.11       |
| sens <sub>2</sub> | 0.014       | 0.007      | 0.93            | 0.90       |
| sens <sub>3</sub> | 0.114       | 0.096      | 0.71            | 0.39       |
| sens <sub>4</sub> | 0.183       | 0.178      | 0.51            | 0.07       |
| spec <sub>1</sub> | -0.010      | -0.003     | 0.89            | 0.90       |
| spec <sub>2</sub> | -0.045      | -0.040     | 0.26            | 0.01       |
| spec <sub>3</sub> | -0.008      | -0.005     | 0.88            | 0.85       |
| spec <sub>4</sub> | -0.006      | -0.002     | 0.90            | 0.88       |
| $\pi_1$           | -0.066      | -0.061     | 0.50            | 0.10       |

Table 5: The bias and coverage of sensitivity and specificity when assessing the sensitivity of the test to diagnose any disease (either state 1 or state 3) when the three state model is true. The labels sens<sub>*i*</sub> and spec<sub>*i*</sub> represent the sensitivity and specificity of test *i*, respectively. The posterior median was used for estimation and the coverage is based off a 90% central credible interval.

## 57 **References**

- 58 Papastamoulis, P. (2016), “label.switching: An R package for dealing with the label  
59 switching problem in MCMC outputs,” *Journal of Statistical Software*, 69.
- 60 Qu, Y., Tan, M., and Kutner, M. H. (1996), “Random effects models in latent class analysis  
61 for evaluating accuracy of diagnostic testss,” *Biometrics*, 52, 797–810.
- 62 Stephens, M. (2000), “Dealing with label switching in mixture models,” *Journal of the Royal  
63 Statistical Society: Series B (Statistical Methodology)*, 62, 795–809.
